# Supplementary material
Source: Springer Nature journal article supplement (https://www.springermedizin.de/resource/supplementary/13098_2013_283_MOESM1_ESM.pdf/9670890)

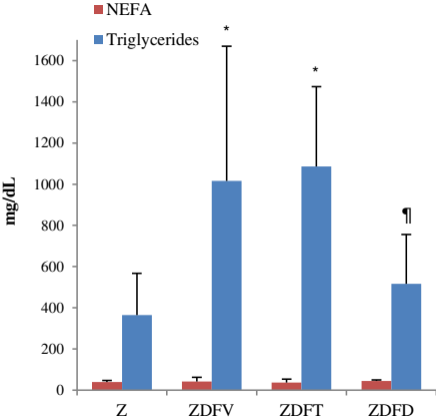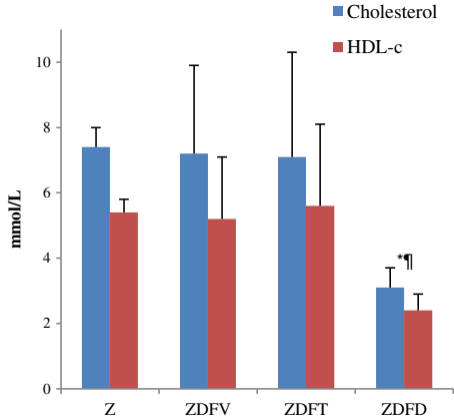

Supplement: MOESM1 [file 9670890]
